# Supplementary material
Source: publisher figshare collection journal article supplement (https://tandf.figshare.com/ndownloader/files/14079773)
Supplement: Supplementary file 1 [file 14079773]

Appendix Table 1. Normative values (T-score and %ile) for raw scores for Carson-Jones Thematic Scoring [Age range 60-69; Education 12-15 years].

| Carson-Jones Thematic Immediate | | | | Carson Jones Thematic Delay | | |
| --- | --- | --- | --- | --- | --- | --- |
| raw | %ile | T-score | raw | | %ile | T-score |
| **12.5** | 5 | 33 | **7.5** | | 5 | 33 |
| **15** | 9 | 37 | **9.5** | | 9 | 37 |
| **17.5** | 14 | 39 | **10** | | 14 | 39 |
| **21.5** | 18 | 41 | **12** | | 18 | 41 |
| **23** | 23 | 43 | **20** | | 23 | 43 |
| **23.5** | 27 | 44 | **20.5** | | 27 | 44 |
| **25.5** | 32 | 45 | **21** | | 41 | 47 |
| **26.5** | 36 | 46 | **22** | | 46 | 49 |
| **27** | 41 | 47 | **23.5** | | 50 | 50 |
| **27.5** | 46 | 49 | **24** | | 59 | 52 |
| **28** | 50 | 50 | **25** | | 64 | 53 |
| **29.5** | 55 | 51 | **29** | | 68 | 55 |
| **30** | 59 | 52 | **29.5** | | 73 | 56 |
| **31** | 64 | 53 | **32** | | 82 | 59 |
| **32** | 68 | 55 | **32.5** | | 91 | 63 |
| **33** | 73 | 56 | **42** | | 99 | 72 |
| **36** | 77 | 57 |  | |  |  |
| **37** | 82 | 59 |  | |  |  |
| **40** | 91 | 63 |  | |  |  |
| **46** | 96 | 67 |  | |  |  |
| **48** | 99 | 72 |  | |  |  |
| N = 22 | | | | | | |

Appendix Table 2. Normative values (T-score and %ile) for raw scores for Carson-Jones Thematic Scoring [Age range 70-79; Education 12-15 years].

| Carson-Jones Thematic Immediate | | | | Carson Jones Thematic Delay | | |
| --- | --- | --- | --- | --- | --- | --- |
| raw | %ile | T-score | raw | | %ile | T-score |
| **14.5** | 7 | 35 | **10** | | 7 | 35 |
| **18** | 13 | 39 | **15** | | 13 | 39 |
| **27** | 27 | 44 | **17.5** | | 20 | 41 |
| **29** | 40 | 47 | **19.5** | | 27 | 44 |
| **30** | 47 | 49 | **21** | | 33 | 45 |
| **32.5** | 53 | 51 | **24** | | 40 | 47 |
| **33** | 60 | 52 | **27** | | 53 | 51 |
| **34.5** | 67 | 54 | **27.5** | | 60 | 52 |
| **35.5** | 73 | 56 | **28.5** | | 67 | 54 |
| **36** | 80 | 58 | **31** | | 80 | 58 |
| **36.5** | 87 | 61 | **33.5** | | 87 | 61 |
| **38** | 93 | 65 | **37.5** | | 93 | 65 |
| **39.5** | 99 | 72 | **39** | | 99 | 72 |
| N = 15 | | | | | | |

Appendix Table 3. Normative values (T-score and %ile) for raw scores for Carson-Jones Thematic Scoring [Age range 80-89; Education 12-15 years].

| Carson-Jones Thematic Immediate | | | | Carson Jones Thematic Delay | | |
| --- | --- | --- | --- | --- | --- | --- |
| raw | %ile | T-score | raw | | %ile | T-score |
| **23.5** | 33 | 45 | **12.5** | | 67 | 54 |
| **29** | 67 | 54 | **23.5** | | 99 | 72 |
| **30** | 99 | 72 |  | |  |  |
| N = 3 | | | | | | |

Appendix Table 4. Normative values (T-score and %ile) for raw scores for Carson-Jones Thematic Scoring [Age range 60-69; Education 16 years].

| Carson-Jones Thematic Immediate | | | | Carson Jones Thematic Delay | | |
| --- | --- | --- | --- | --- | --- | --- |
| Raw | %ile | T-score | raw | | %ile | T-score |
| **21.5** | 7 | 35 | **19** | | 7 | 35 |
| **25.5** | 14 | 39 | **21** | | 14 | 39 |
| **26** | 21 | 42 | **22** | | 29 | 44 |
| **26.5** | 29 | 44 | **22.5** | | 36 | 46 |
| **27** | 36 | 46 | **24** | | 43 | 48 |
| **28** | 43 | 48 | **27** | | 50 | 50 |
| **28.5** | 50 | 50 | **28** | | 64 | 53 |
| **32** | 57 | 51 | **33.5** | | 71 | 55 |
| **36.5** | 64 | 53 | **36** | | 86 | 61 |
| **38** | 71 | 55 | **36.5** | | 93 | 65 |
| **40** | 79 | 58 | **44.5** | | 99 | 72 |
| **42** | 93 | 65 |  | |  |  |
| **46.5** | 99 | 72 |  | |  |  |
| N = 14 | | | | | | |

Appendix Table 5. Normative values (T-score and %ile) for raw scores for Carson-Jones Thematic Scoring [Age range 70-79; Education 16 years].

| Carson-Jones Thematic Immediate | | | | Carson Jones Thematic Delay | | |
| --- | --- | --- | --- | --- | --- | --- |
| raw | %ile | T-score | raw | | %ile | T-score |
| **11.5** | 8 | 36 | **8** | | 8 | 36 |
| **25** | 17 | 40 | **21** | | 17 | 40 |
| **26.5** | 25 | 43 | **22** | | 25 | 43 |
| **27.5** | 33 | 45 | **23** | | 33 | 45 |
| **30** | 42 | 48 | **24** | | 42 | 48 |
| **32** | 50 | 50 | **26.5** | | 50 | 50 |
| **35** | 58 | 52 | **31** | | 58 | 52 |
| **36** | 67 | 54 | **31.5** | | 67 | 54 |
| **37** | 75 | 57 | **33.5** | | 83 | 59 |
| **38.5** | 83 | 59 | **36** | | 92 | 64 |
| **39** | 92 | 64 | **36.5** | | 99 | 72 |
| **44** | 99 | 72 |  | |  |  |
| N = 12 | | | | | | |

Appendix Table 6. Normative values (T-score and %ile) for raw scores for Carson-Jones Thematic Scoring [Age range 80-89; Education 16 years].

| Carson-Jones Thematic Immediate | | | | Carson Jones Thematic Delay | | |
| --- | --- | --- | --- | --- | --- | --- |
| raw | %ile | T-score | raw | | %ile | T-score |
| **10** | 14 | 39 | **7** | | 14 | 39 |
| **16** | 29 | 44 | **9** | | 29 | 44 |
| **19.5** | 43 | 48 | **14** | | 43 | 48 |
| **21** | 57 | 51 | **17.5** | | 57 | 51 |
| **24** | 71 | 55 | **19** | | 71 | 55 |
| **29** | 86 | 61 | **24** | | 86 | 61 |
| **43** | 99 | 72 | **41** | | 99 | 72 |
| N = 7 | | | | | | |

Appendix Table 7. Normative values (T-score and %ile) for raw scores for Carson-Jones Thematic Scoring [Age range 60-69; Education 17-20 years].

| Carson-Jones Thematic Immediate | | | | Carson Jones Thematic Delay | | |
| --- | --- | --- | --- | --- | --- | --- |
| raw | %ile | T-score | raw | | %ile | T-score |
| **19.5** | 5 | 33 | **13** | | 5 | 33 |
| **27** | 24 | 43 | **17.5** | | 10 | 37 |
| **27.5** | 33 | 45 | **19** | | 14 | 39 |
| **28** | 38 | 47 | **19.5** | | 19 | 41 |
| **28.5** | 43 | 48 | **21.5** | | 24 | 43 |
| **29** | 52 | 51 | **22.5** | | 29 | 44 |
| **30** | 57 | 51 | **23** | | 33 | 45 |
| **31** | 62 | 53 | **24** | | 38 | 47 |
| **31.5** | 67 | 54 | **24.5** | | 48 | 49 |
| **32** | 71 | 55 | **25.5** | | 52 | 50 |
| **33** | 76 | 57 | **26.5** | | 57 | 51 |
| **33.5** | 81 | 59 | **28** | | 62 | 53 |
| **36** | 86 | 61 | **28.5** | | 67 | 54 |
| **37** | 91 | 63 | **29** | | 71 | 55 |
| **42.5** | 95 | 66 | **29.5** | | 76 | 57 |
| **44** | 99 | 72 | **32** | | 81 | 59 |
|  |  |  | **32.5** | | 86 | 61 |
|  |  |  | **36.5** | | 91 | 63 |
|  |  |  | **40** | | 95 | 66 |
|  |  |  | **41** | | 99 | 72 |
| N = 21 | | | | | | |

Appendix Table 8. Normative values (T-score and %ile) for raw scores for Carson-Jones Thematic Scoring [Age range 70-79; Education 17-20 years].

| Carson-Jones Thematic Immediate | | | | Carson Jones Thematic Delay | | |
| --- | --- | --- | --- | --- | --- | --- |
| raw | %ile | T-score | raw | | %ile | T-score |
| **13.5** | 4 | 32 | **8** | | 4 | 32 |
| **15.5** | 8 | 36 | **11** | | 8 | 36 |
| **24** | 15 | 39 | **16** | | 15 | 39 |
| **24.5** | 19 | 41 | **17.5** | | 23 | 43 |
| **25** | 23 | 43 | **18** | | 27 | 44 |
| **25.5** | 31 | 45 | **20** | | 35 | 46 |
| **26.5** | 39 | 47 | **21** | | 39 | 47 |
| **28** | 54 | 51 | **23** | | 46 | 49 |
| **30.5** | 62 | 53 | **23.5** | | 50 | 50 |
| **34.5** | 65 | 54 | **35** | | 54 | 51 |
| **35.5** | 73 | 56 | **26.5** | | 58 | 52 |
| **37** | 77 | 57 | **27** | | 62 | 53 |
| **37.5** | 81 | 59 | **28** | | 65 | 54 |
| **39.5** | 85 | 60 | **29.5** | | 73 | 56 |
| **41** | 92 | 65 | **31** | | 77 | 57 |
| **43.5** | 96 | 67 | **35** | | 81 | 59 |
| **50** | 99 | 72 | **36** | | 89 | 62 |
|  |  |  | **37** | | 92 | 65 |
|  |  |  | **39.5** | | 96 | 67 |
|  |  |  | **46.5** | | 99 | 72 |
| N = 26 | | | | | | |

Appendix Table 9. Normative values (T-score and %ile) for raw scores for Carson-Jones Thematic Scoring [Age range 80-89; Education 17-20 years].

| Carson-Jones Thematic Immediate | | | | Carson Jones Thematic Delay | | |
| --- | --- | --- | --- | --- | --- | --- |
| raw | %ile | T-score | raw | | %ile | T-score |
| **16.5** | 11 | 37 | **13** | | 11 | 37 |
| **21** | 22 | 42 | **16.5** | | 22 | 42 |
| **23.5** | 33 | 45 | **22.5** | | 33 | 45 |
| **31.5** | 56 | 51 | **24** | | 44 | 48 |
| **35.5** | 67 | 54 | **24.5** | | 56 | 51 |
| **36** | 89 | 62 | **26** | | 67 | 54 |
| **47.5** | 99 | 72 | **26.5** | | 78 | 57 |
|  |  |  | **33** | | 89 | 62 |
|  |  |  | **45** | | 99 | 72 |
| N = 9 | | | | | | |
